# Supplementary material for: Sorghum (Sorghum bicolor L. Moench) Gluten-Free Bread: The Effect of Milling Conditions on the Technological Properties and In Vitro Bioaccessibility of Polyphenols and Minerals
Source: MDPI journal article supplement (doi:10.3390/foods12163030), 2023-08-12
Supplement: s1 [file s1]

# Sorghum (*Sorghum bicolor* L. Moench) Gluten-Free Bread: the Effect of Milling Conditions on the Technological Properties and *In Vitro* Bioaccessibility of Polyphenols and Minerals

María Isabel Curti <sup>1,2</sup>, Pablo Martín Palavecino <sup>3,4</sup>, Marianela Savio <sup>1,2</sup>, María Verónica Baroni <sup>3,5</sup> and Pablo Daniel Ribotta <sup>3,4,\*</sup>

<sup>1</sup> Facultad Ciencias Exactas y Naturales, Universidad Nacional de La Pampa, Santa Rosa 6300, Argentina; mariacurti@gmail.com (M.I.C.); msavio@exactas.unlpam.edu.ar (M.S.)

<sup>2</sup> Instituto de Ciencias de la Tierra y Ambientales de La Pampa (INCITAP, CONICET -UNLPAM), Santa Rosa 6300, Argentina

<sup>3</sup> Instituto de Ciencia y Tecnología de Alimentos Córdoba (ICYTAC, CONICET-UNC), Córdoba, 5000, Argentina; pmpalavecino@gmail.com (P.M.P.); vbaroni@unc.edu.ar (M.V.B.)

<sup>4</sup> Facultad de Ciencias Exactas, Físicas y Naturales, Universidad Nacional de Córdoba, Córdoba 5000, Argentina

<sup>5</sup> Facultad de Ciencias Químicas, Departamento de Química Orgánica, Universidad Nacional de Córdoba, Córdoba 5000, Argentina

\* Correspondence: pdribotta@unc.edu.ar. Tel.: +54-351-5353755 (ext. 17141)

**Table S1.** Particle size distribution parameters of sorghum flour

| Sample | D 10 (μm)          | D 50 (μm)          | D90 (μm)           | Av (D4,3) (μm)      | Span             |
|--------|--------------------|--------------------|--------------------|---------------------|------------------|
| WWS-IM | 30.3 <sup>a</sup>  | 437.8 <sup>a</sup> | 786.6 <sup>a</sup> | 431.6 <sup>a</sup>  | 1.9 <sup>b</sup> |
| PWS-IM | 187.6 <sup>b</sup> | 564.7 <sup>a</sup> | 883.6 <sup>b</sup> | 561.6 <sup>b</sup>  | 1.2 <sup>a</sup> |
| WS-RM  | 156.3 <sup>b</sup> | 456.7 <sup>a</sup> | 777.8 <sup>a</sup> | 468.7 <sup>ab</sup> | 1.4 <sup>a</sup> |

Values are expressed as mean (n = 3). Different letters in the same column express significant differences (p<0.05). WWS: whole white sorghum flour; PWS: polished white sorghum flour; IM: impact milling; RM: roller milling. D4.3: volume mean diameter; D10, D50, D90: diameters where 10%, 50%, and 90% of the particle population are below these values, respectively. Span: polydispersity index.

**Table S2.** Polyphenolic compounds identified in sorghum flour and bread

| Nº | Tr (min) | Tentative ID                  | Molecular formula                                             | [M-H]- experimental (m/z) | [M-H]- calculated (m/z) | Fragments MS/MS (m/z) |
|----|----------|-------------------------------|---------------------------------------------------------------|---------------------------|-------------------------|-----------------------|
| 1  | 12.1     | Dicaffeoyl spermidine I       | C <sub>25</sub> H <sub>30</sub> N <sub>3</sub> O <sub>6</sub> | 468.2107                  | 468.2140                | 332, 306              |
| 2  | 12.5     | Dicaffeoyl spermidine II      | C <sub>25</sub> H <sub>30</sub> N <sub>3</sub> O <sub>6</sub> | 468.2210                  | 468.2140                | 332, 306              |
| 3  | 12.7     | Caffeoyl feruloyl spermidine  | C <sub>26</sub> H <sub>33</sub> N <sub>3</sub> O <sub>6</sub> | 482.2274                  | 482.2297                | 332, 306              |
| 4  | 14.1     | 2-O caffeoyl glycerol         | C <sub>12</sub> H <sub>13</sub> O <sub>6</sub>                | 253.0736                  | 253.0718                | 179, 161              |
| 5  | 15.3     | Caffeic acid                  | C <sub>9</sub> H <sub>7</sub> O <sub>4</sub>                  | 179.0331                  | 179.0350                |                       |
| 6  | 16.8     | Coumaroyl glycerol            | C <sub>12</sub> H <sub>13</sub> O <sub>5</sub>                | 237.0778                  | 237.0768                |                       |
| 7  | 22.7     | Dicaffeoyl glycerol           | C <sub>21</sub> H <sub>19</sub> O <sub>9</sub>                | 415.1058                  | 415.1032                | 253, 179, 161         |
| 8  | 24.4     | Coumaroyl caffeoyl glycerol   | C <sub>21</sub> H <sub>20</sub> O <sub>8</sub>                | 399.1080                  | 399.1085                | 253, 179, 235         |
| 9  | 24.6     | Feruloyl caffeoyl glycerol    | C <sub>22</sub> H <sub>21</sub> O <sub>9</sub>                | 429.1174                  | 429.1191                | 193, 235              |
| 10 | 25.4     | Naringenin                    | C <sub>15</sub> H <sub>12</sub> O <sub>5</sub>                | 271.0590                  | 271.0612                | 151, 177              |
| 11 | 26.1     | Luteolin                      | C <sub>15</sub> H <sub>10</sub> O <sub>6</sub>                | 285.0379                  | 285.0405                |                       |
| 12 | 26.5     | Coumaroyl-feruloyl-glycerol   | C <sub>22</sub> H <sub>22</sub> O <sub>8</sub>                | 413.1208                  | 413.1242                | 193, 285              |
| 13 | 29.1     | Apigenin                      | C <sub>15</sub> H <sub>9</sub> O <sub>5</sub>                 | 269.0435                  | 269.0455                | 225                   |
| 14 | 29.5     | Hispidulin                    | C <sub>16</sub> H <sub>12</sub> O <sub>6</sub>                | 299.0563                  | 299.0561                | 284                   |
| 15 | 31.4     | Tri-hydroxy-octadecenoic acid | C <sub>18</sub> H <sub>33</sub> O <sub>5</sub>                | 329.2315                  | 329.2333                | 211, 229              |

Tr: retention time
